# **DECLINE OF HANDWASHING AND MASKING AMONG THE GENERAL POPULATION IN POST COVID-19 PANDEMIC: INSIGHTS FROM A MIXED METHODS STUDY IN GHANA**

**Short Title: The non-performance of handwashing and masking by the public nowadays**

## **Research Article**

### **Authors**

Emmanuel Lamptey, <sup>1\*</sup>;0000-0002-7822-7593

Stanley Yaidoo<sup>3</sup> 0000-0002-8322-2869

Moses tia Banoya<sup>□</sup> 0000-0003-3828-5462

Evans osei Boakye<sup>□</sup> 0000-0002-0737-5126

Dooshima Aki Benita<sup>6</sup> 0000-0001-5393-4411

Ephraim Kumi Senkyire<sup>2</sup> 0000-0003-0789-701X

Corresponding email: [emmanuelamptey88@gmail.com](mailto:emmanuelamptey88@gmail.com)

<sup>1</sup> KAAF University college Gomoa East District Ghana

<sup>2</sup> St.Gregory Catholic Hospital, Central Region Gomoa East District

<sup>3</sup> Methodist University Ghana

<sup>□</sup> Department of Social Work, University of Ghana, Legon

<sup>□</sup> Department of Psychology, Benue State University Makurdi Nigeria

<sup>6</sup> Ga-West Municipal Hospital, Ghana Health Service Accra Ghana

Source of Funding/Support: None

Acknowledgment: None

Conflict of Interest: None

### **Corresponding Author**

Emmanuel Lamptey

KAAF University College Ghana

+233203278619

# **DECLINE OF HANDWASHING AND MASKING AMONG THE GENERAL POPULATION IN POST COVID-19 PANDEMIC: INSIGHTS FROM A MIXED METHODS STUDY IN GHANA**

## **ABSTRACT**

COVID-19 has now entered the endemic stage where the virus is widespread with less fatality than it was in 2020. Restrictions and mandates such as handwashing and masking are eased although the pandemic is not yet over. Many have concluded that we have reached a point that marks the end of the pandemic spurring changes in public behavior. However, SARS-CoV-2 is still causing deaths every day and cases have not plateaued at low level. Better knowledge on why people have relented in handwashing and masking is needed to guide the development of effective interventions against future waves of the infection. In this study, we explored factors contributing to this pattern of behavior in Ghana. Questionnaires were administered to 350 respondents, via social media (WhatsApp, LinkedIn, Twitter, Facebook, reddit,) and these were used to determine the level of handwashing and masking at the first stage of study. Screening and scoring of the questionnaires were used to estimate the level of these activities at the second stage. Among all respondents, we identified and selected 279 participants at the second stage: 95 as decliners, 120 non-regulars, and 64 maintainers according to their level of these activities and adapted scoring criteria. For each category, a group of 5 participants were randomly selected to take part in an in-depth interview. The theory of planned behavior guided our analysis. Six themes emerged from the analysis with the acronym, IMPASE; inconvenience and contamination, Mass population, pandemic patterns and regulations, Availability, Safety and infection prevention, environment and activity. These themes appeared to have elements relating to another component of the theory of planned behavior. Collectively, the environment

(Subjective norms) and pattern of pandemic and regulation (Perceived behavioral control) interact with each other to ultimately influence handwashing and masking. Declining and non-regularity were associated with inconvenience and contamination. Maintenance is associated with the environment and activity. Thus, public educational campaigns must be intensified to highlight and address these themes. The public health authorities, employers and, essential services could play an important role in enforcing and disseminating such information.

**Keywords:** COVID-19, mask, hand disinfection, population, public health

## **INTRODUCTION**

The outbreak of the COVID-19 pandemic necessitated unprecedented, significant and sustained Infection Prevention and Control measures (IPC) to reduce the risk of exposure and prevent transmission [1][2]. Aggressive Infection Prevention and Control measures (IPC) were adapted to mitigate the spread of the pathogen (SARS-CoV-2) in public and health care-associated transmissions [3]. Since March 2020, and throughout the course of the pandemic, the World Health Organization (WHO), recommended that each country implements a comprehensive package of these measures adopted to local context and epidemiological scenarios to prevent rapid transmission of SARS-CoV-2[4]. IPC strategies such as universal masking, physical distancing and handwashing become the first ways of stopping the spread of SARS-CoV-2 and are a critical part of daily living among the general population globally [5]. Schools, workplaces, public transportation and spaces had these IPC principles installed into everyday use to protect patrons. In Ghana, these measures were mandatory in public places during the outbreak [6].

The risk of transmission is low with proper handwashing as SARS-CoV-2 is inactivated and wearing a well-fitting mask cuts down the spread of the virus by containing droplets when an

infected person coughs, talks, or breath into the environment [7][8]. Further experimental evidence demonstrated that COVID-19 could be stopped if at least 70% of the public wore a face mask [9]. In the context of circulating variant of SARS-CoV-2 and the potential emergence of future variant of concern, WHO recommends that IPC be maintained and continued stringently among the population [4].

Consistent compliance with IPC protocols among the public is effective in minimizing the risk of COVID-19, especially now that the pandemic is still ongoing [10] as well as other respiratory infections such as influenza [11]. While IPC protocols have always been applicable in the pandemic, many people have relaxed on the basics of these procedures although SARS-CoV-2 created increased momentum for improved public knowledge and strengthened existing IPC practices [10]. People now do not observe these protocols as before, and there are marked declines.

Although vaccination may be factor for the relaxation of these protective measures, vaccines are not impregnable or 100% effective [13].Transmission can be reduced in all cases if these measures are added [13].People may have false sense of security that handwashing and masking are no longer needed [14].However, Vaccines only teach the body to successfully fight a virus without getting sickness but masking and handwashing decrease exposure to the virus [14].

Interventions to encourage compliance to high levels of these safety measures for future pandemics may be improved by considering what factors have contributed to this behavior. In-depth understanding of why some individuals have discontinued or maintained the measures is essential and could help understand this behavioral pattern. In this study, we use a mixed-method approach and the Theory of Planned Behavior (TPB) to explore factors contributing to the decline, non-regularity and maintenance of handwashing and masking after the surge of the

COVID-19 pandemic. We used this theory because it can offer explanations and, predictions attached to this patterns of behavior and link them with participants' beliefs.

The TPB is made up of three components (Attitude towards the behavior, subjective norm and perceived behavioral control) (Figure 1) and stems from the concept that behaviors are modeled through the intentions of individuals and the intentions are modified by these three components interacting with each other. If these components are viewed positively in relation to the task of handwashing and masking, the intention of doing them will be stronger and the otherwise for negative ways (Table 2).

## **Materials and Methods**

### **Participants Recruitment and Sampling**

We recruited participants through online advertising on websites, social media handles (WhatsApp, Facebook, Twitter, reddit), information posters and verbally asking interested people to voluntarily participate in the study from August 01–August 31, 2022. We invited participants from all parts of the country to take part in the study using all available platforms, professional groups and research networking.

Individuals aged 18 years and above were included irrespective of gender, sexual orientation, level of education and occupation. Additionally, eligible participants were also invited through a message on the LinkedIn pages of all authors and recruited participants were asked if they knew any colleagues who could voluntarily participate. Objectivity and variation across various cultures and genders were aimed when recruiting the participants.

In determining the minimum sample size, we used the Cochran formulae [15] and information from previous studies [16]. Given that  $z = 1.96$  (at 95% confidence interval),  $p$  (portion of the

population with adequate knowledge about COVID-19=0.27),  $q(1-p) = 0.73$  and  $e$  (margin of error=0.05). Hence a minimum of 303 participants were needed, 10% non-response rate was projected bringing the total sample to at least 350 participants.

### **Data Collection Procedure and Validity of Questionnaire**

This study was conducted in two phases. In phase one, participants were invited to complete an online cross-sectional survey for the quantitative aspect. The questionnaire for the survey at phase one was adapted and developed from the Physical Activity Questionnaire for Adolescent (PAQ-A). The developed questionnaire consists of five(5) items which assess the levels of handwashing and masking or any of them at various times of the week over the last 7 days (Appendix I). The five items include: 1) Have you been handwashing, masking up or doing any one of them in the past seven days, if no then submit your response, 2) if yes how many times a week, 3) how often are you active at wearing mask, washing your hands or doing any of them in the last 7 days, 4) In the last 7 days how many days have you worn a mask or washed your hands when going to public spaces or returning from public gathering; 5) which one of the following describe you best for the last 7 days.

The internal consistency of handwashing and masking up was tested using a reliability test where the Cronbach alpha coefficient aided in determining the reliability of the variables. The Cronbach alpha measured was 0.836, according to Griethuijsen, the range of Cronbach alpha of 0.6 to 0.7 is adequate, credible and reliable [17]. The content of the questionnaires were reviewed by four (ESK, EM, GT) experts in infectious disease epidemiology and one communication specialist (JM). It was determined by the panel that the content of the questionnaire were relevant to the concept and number of items were sufficient to represent the domains. The panel

recommended translating to local language or context for easy understanding during data collection.

Participants who responded to Item 1 as No, were scored 0 and completely classified under decliners of handwashing and masking up (Group 1). From Items 2 to 5, the answers to each item start from the lowest activity response and progress to the highest activity response. The lowest activity response is 1 and the highest activity response is 5. The mean of the 4 items (2, 3, 4, and 5) were taken to give the summary score of participants and further categorized as non-regulars and maintainers. The mean score of 1–3 were categorized as non-regulars while 4–5 were put under maintainers. Participants were categorized by questionnaire score because the degree of performance of these infection control measures may vary among individuals. We excluded participants with incomplete responses to the survey questionnaires (Figure 2).

### **Group Interview**

Our plan in the second phase was to enable participants in each category or group to share their thoughts on the pattern and levels of handwashing and masking up. For each group, 5 randomly selected participants were invited for an in-depth interview. A semi-structured interview guide (Appendix 2) was developed by reviewing relevant literature on the topic [18]. The interview guide consisted of four main open-ended questions designed for each group (Appendix 2). It was developed with the aim of understanding what were perceived as factors associated with the decline, non-regularity and maintenance of handwashing and masking up. The questions were made flexible to target individual attitudes, context and barriers. The interviews were conducted via telephone calls during the second stage after obtaining consent from the participants. The interviews were digitally recorded, involved 15 respondents (5 from each group), lasted between 20 and 40 minutes and transcribed in English. All interviews occurred 1st -5<sup>th</sup> September

2022 and were held by the researchers (EL, SY, EKS, and EOB) who were trained in qualitative methodology and interview techniques. Data collection ceased when no new themes arose in the analysis of the last interview indicating data saturation reached. Participants were directed to stay focus on the key research questions and they were interviewed one at a time to elicit more robust answers. To increase the credibility of the data, participants were encouraged to cite examples and instances to support their statement throughout the interview. Transcripts were checked for accuracy for each participants after the interview

### **Ethical Considerations**

The study protocols (GHS-ERC 045/08/22) were submitted to the Ghana Health Ethical Review Board and clearance. Obtained. All procedures employed conformed to the declaration of Helsinki. Participation was voluntary and the purpose of the study was fully explained after which informed consent was obtained. Participants were informed about their right to withdraw their involvement at any time and their confidentiality was fully maintained without participant identifiers. The study also followed the consolidated criteria for reporting qualitative research [12].

### **Data Analysis**

Data collected from the quantitative study were analyzed with Statistical Package for Social Sciences (SPSSv22). Descriptive statistics were computed. We used chi-square test to explore the difference between the Non-regular and Maintenance category (Table 2).

For qualitative, Interview transcripts were analyzed with thematic analysis. Thematic analysis was chosen to capture concepts or themes for informing policies or intervention development. Four researchers re-read all the transcripts and discussed the themes identified in the analysis.



We coded the transcripts using codes derived independently from the content of the transcripts. The codes were sorted and grouped into common themes. The list of themes was reviewed, interconnected and discussed with the whole researcher team to improve the quality of the analysis. The final coded data was further reviewed and validated by two independent researchers who have supervised and conducted similar qualitative research.

## **RESULTS**

With the target to get the survey link distributed nationwide, 350 participants completed the questionnaire in the first phase. Of those, 71 were not scored or analyzed because of incomplete and implausible responses. Of the remaining eligible participants, 59.5% were females (Table 1), 95 were categorized as decliners, and 120 were non-regulars and 64 maintainers (Figure2). Details characteristics for both Non-regular and maintainer category in relation to items of the quantitative analysis are presented in Table 2 and 3.

In-depth interviews were held with 5 participants from each group (Figure2). Six general themes emerged from the analysis. The six themes and their particularities were related to both handwashing and masking as described below.

**Table 1:** Demographic characteristics of participants selected at the First stage

| <b>Characteristics of Participants</b> | <b>(N=279)</b> |
|----------------------------------------|----------------|
| Mean Age(std)                          | 29.18(3.4)     |
| <b>Gender</b>                          |                |
| Male                                   | 112(40.1%)     |
| Female                                 | 167(59.9%)     |
| <b>Marital Status</b>                  |                |
| Married                                | 102(36.5%)     |
| Relationship                           | 28(10.0%)      |
| Single                                 | 149(53.4%)     |
| <b>Education</b>                       |                |
| Basic education                        | 46(16.4%)      |
| Secondary education                    | 106(37.9%)     |
| Higher education                       | 127(45.7%)     |
| <b>Occupation</b>                      |                |
| Employed                               | 236(84.8%)     |
| Unemployed                             | 43(15.2%)      |

**Table 2:** Participant response to the quantitative questionnaire in relation to masking and handwashing.

| Items(score)                                                                                    | Total(N279) | Decliners<br>N=95 |                               |                             |                      |                |
|-------------------------------------------------------------------------------------------------|-------------|-------------------|-------------------------------|-----------------------------|----------------------|----------------|
| <b>1. Have you been handwashing, masking up or doing any one of them in the past seven days</b> |             |                   |                               |                             |                      |                |
| No                                                                                              |             | 95(34.0%)         |                               |                             |                      |                |
| Yes                                                                                             |             |                   |                               |                             |                      |                |
|                                                                                                 |             |                   | <b>Non-Regulars<br/>N=120</b> | <b>Maintainers<br/>N=64</b> | <b>X<sup>2</sup></b> | <b>P-value</b> |
| <b>2. If No, no need to continue just submit but if yes how many times a week</b>               |             |                   |                               |                             |                      |                |
| None[1]                                                                                         |             |                   | 7(5.8%)                       | 0(0%)                       |                      |                |
| 1-2 times a week[2]                                                                             |             |                   | 22(18.3%)                     | 0(0%)                       |                      |                |
| 3-4 times a week[3]                                                                             |             |                   | 63(52.5%)                     | 3(4.7%)                     | 10.66                | 0.54           |
| 5-6 times a week[4]                                                                             |             |                   | 12(10%)                       | 7(10.9%)                    |                      |                |
| 7 times or more a week[5]                                                                       |             |                   | 16(13.3%)                     | 54(84.4%)                   |                      |                |

| <b>3.How often are you active at wearing mask, washing hands or doing any one of them in the last 7 days</b>                                           |  |  |           |           |       |      |
|--------------------------------------------------------------------------------------------------------------------------------------------------------|--|--|-----------|-----------|-------|------|
| I don't do any[1]                                                                                                                                      |  |  | 6(5%)     | 0(0%)     |       |      |
| Hardly ever[2]                                                                                                                                         |  |  | 11(9.2%)  | 0(0%)     |       |      |
| Sometimes[3]                                                                                                                                           |  |  | 62(51.7%) | 0(0%)     | 4.78  | 0.78 |
| Quite often[4]                                                                                                                                         |  |  | 34(28.3%) | 21(67.2%) |       |      |
| Always[5]                                                                                                                                              |  |  | 7(5.8%)   | 43(67.2%) |       |      |
| <b>4.In the last 7 days, how many days have you worn a mask, washed your hands or done any one of them when going to public gathering</b>              |  |  |           |           |       |      |
| None[1]                                                                                                                                                |  |  | 4(3.3%)   | 0(0%)     |       |      |
| 1 time last week[2]                                                                                                                                    |  |  | 25(20.8%) | 0(0%)     | 10.40 | 0.58 |
| 2 or 3 times last week[3]                                                                                                                              |  |  | 48(40%)   | 3(4.7%)   |       |      |
| 4 times last week[4]                                                                                                                                   |  |  | 23(19.2%) | 4(6.3%)   |       |      |
| 5 times last week[5]                                                                                                                                   |  |  | 20(16.7%) | 57(89.1%) |       |      |
| <b>5. Which one of the following describes you best for the last 7 days? Read all five statements before deciding on one answer that describes you</b> |  |  |           |           |       |      |
| All or most of my time, I do                                                                                                                           |  |  | 17(14.2%) | 0(0%)     |       |      |

|                                                                                            |  |  |           |           |      |      |
|--------------------------------------------------------------------------------------------|--|--|-----------|-----------|------|------|
| little masking<br>or<br>handwashing[1]                                                     |  |  |           |           |      |      |
| I sometimes(1-<br>2 times last<br>week) worn a<br>mask and or<br>wash the<br>hands[2]      |  |  | 30(25.0)  | 0(0%)     | 7.09 | 0.85 |
| I often(3-4<br>times last<br>week) mask up<br>and or washed<br>my hands[3]                 |  |  | 65(54.2%) | 3(4.7%)   |      |      |
| I quite often(5-<br>6 times last<br>week) did wear<br>mask and or<br>washed my<br>hands[4] |  |  | 8(6.7%)   | 17(26.6%) |      |      |
| I very often( 7<br>or more times<br>last week) did                                         |  |  | 0(0%)     | 44(68.8%) |      |      |

|                                           |  |  |  |  |  |  |
|-------------------------------------------|--|--|--|--|--|--|
| masked up and<br>or washed my<br>hands[5] |  |  |  |  |  |  |
|-------------------------------------------|--|--|--|--|--|--|

**Table 3:** Average score attained by Non-regulars and Maintainers at first stage

| <b>Category</b>          |           |            |                            |           |            |
|--------------------------|-----------|------------|----------------------------|-----------|------------|
| <b>Maintainers(N=64)</b> |           |            | <b>Non-Regulars(N=120)</b> |           |            |
| Mean Score               | Frequency | Percentage | Mean Score                 | Frequency | Percentage |
| 4                        | 17        | 27.6%      | 1                          | 7         | 5.8%       |
| 5                        | 47        | 72.4%      | 2                          | 35        | 29.2%      |
|                          |           |            | 3                          | 78        | 65%        |

### **Theme 1: Inconvenience and Contamination**

The responses of the COVID-19 pandemic have not been easy for all. Inconvenience and contamination were cited as some dislikes of handwashing and masking preventing people from doing them. Participants of both the decline and non-regular group described these activities in specific terms as distressing. One participant in the decline group stated

“Personally, it is discomforting, it is difficult breathing sometimes wearing a mask for a longtime”

With handwashing the same participant said “what (soap and water) someone has left in the space when washing my hand, especially at the banks. Because of that, I don’t like washing my hands at those places. I feel I may contract some diseases from handwashing”.

Non-regulars also have the same concern. One participant in this group asserted “Breathing is sometimes difficult when you mask up. For the handwashing, people are untaught the right techniques in banks and public places, so they wash without any aseptic techniques leading to infection again instead of prevention”

In particular, masking up and handwashing are suggested by both groups as discomforting, frustrating, and infectious. One participant from group 2 summed this up by saying

“The nose mask is a bit uncomfortable, the handwashing I don’t like washing it regularly, that is all”. This is a non-motivator preventing people from doing them and could also cause non-regulars to completely decline these activities. The study inquired what could motivate non-regulars patrons to do more than before discussed as Theme 2.

## **Theme 2: Availability**

What hinders respondents (Decliners and Non-regulars) from handwashing and masking at any given time also depends on certain factors, which contribute to or create the room for inadequate decision on the initiation of these practices. The availability of handwashing facilities and money for buying mask is a contributor. An extract from participant number 4 in Group one supported this theme

“At times you may not have money to buy a mask, there is no soap to wash hands in some places outside the house. I don’t find it necessary to wash my hands in that situation”. Non-

availability of infection control materials cause hampering and inconsistency in the performances of these activities.

### **Theme 3: Mass population**

The general population is both a contributory cause, integrated part and the outcome of compliance to handwashing and masking. Individuals comprising the mass population interact with each other regulates and defines some of the gestures, reactions, behaviors and anticipation of handwashing and masking. In this context, the population has a sense of engaging in infection control measures informing others to do them as routines. The population has compromised as facilitators of this behavior nowadays. For example, decliners, and non-regulars all reported that almost everybody nowadays is not actively involved in these preventive measures which in turn discourage them not to do them.

Among these two categories of participants, this public behavior is a major barrier to handwashing and masking and they also appear to follow the non-compliance behavior.

“It looks like everyone around don’t do it anymore” A participant in group one said.

“Those at home, who do not understand the severity of COVID-19 cases. These are people who say they don’t know anybody who has had COVID-19.They think COVID is meant to scare people. When you try to explain it they don’t take it much” Another respondent in group two affirmed.

Conversely, colleagues and family members reported positive in handwashing and masking for maintainer (group 3).A typical response of two participants in this group were:

“Regardless of surroundings, my family, we all do”



“My surrounding is mostly at work, my colleagues mask up and wash hands all the time”

#### **Theme 4: Pandemic Patterns and Regulations**

Participants (Non-regulars) reported how they could increase their involvement in the activity of handwashing and masking up. Non-regulars verbalized that a new outbreak or increases in severity of COVID-19 cases will prompt them to consider it a regular routine

One participant explained “A new pandemic will motivate me to mask up regularly but the washing of hands is a hygiene practice so I will motivate myself to do that”

Another participant in this group stated “the fact that the coronavirus has not gone yet, we must put on mask and wash hands to protect ourselves from the disease”.

In contrast, the reduction in the number of cases nowadays or the fact that COVID-19 is not new has a negative influence among the population. A threat posed by a new pandemic or a surge in the number of case fatalities will reactivate infection control measures in the context of human health.

People are eased with these measures and rules enforcing them are relaxed ,as well the reduction in number of recorded cases One participant in Group 2 said “...like the reduction of cases add to the decline of handwashing and wearing mask practices, we don’t really record much cases”.

This was cross confirmed by another participant in another Group (group one) who had this to say “It is no longer mandatory, things are calm now”

#### **Theme 5: Safety and Infection Prevention**

For some participants categorized as maintainers, safety and prevention of infection is an important source of motivations and they take delight in doing them. Feeling safe and protected

from infectious diseases was what they like most and the main inspirer. One maintainer respondent put it this way:

“It keeps me safe from infections. I know that when I wash my hands and mask up, I am able to prevent infection by at least 70%.”

Besides this interest, responses from maintainers also suspect that the habit depends on the individual and is seen differently or has different effect across the general population.

Two participants from this group verbalized it respectively

“It makes me feel good, the moment I do not wash my hands after doing something, I feel I am not complete. I am confident in the next thing that I am doing”

“I don’t want to catch infections or diseases, that is how come I want to mask up and wash my hands, I feel good and confident after doing them”.

These extracts suggest personal preference vitalizes the interest and compliance to ICP guidelines among the general population.

## **Theme 6: The Environment and Activity**

Safety cultures are further motivated by risk perception in different environments and activities. In certain environments or activities where risk of infection is high, there is the need to prioritize these IPC guidelines to meet the challenges and demands. Infection control measures such as handwashing and masking are well described and required in certain environments and activity and the motivation is driven by these factors. The need to protect self, family, patients and community has hierarchical influence and prioritization due to perceived risk and the individuals concerned must follow suit. Certain occupations also involve activities that require handwashing

and masking. One participant in the Maintainer category mentioned “my work environment has contributed to masking up and washing hands as a regular habit. I do that because of my work and it has been very helpful. It shaped me”.

Another participant in this group elaborated “with my line of job, we do mask and wash hands a lot because we come into contact with people who are known to have TB, some are retro-exposed. We need handwashing and masking up to prevent coughing and infection”.

However, individuals in low-risk environment or doing low-risk activities are likely to neglect handwashing and masking with no urgency.

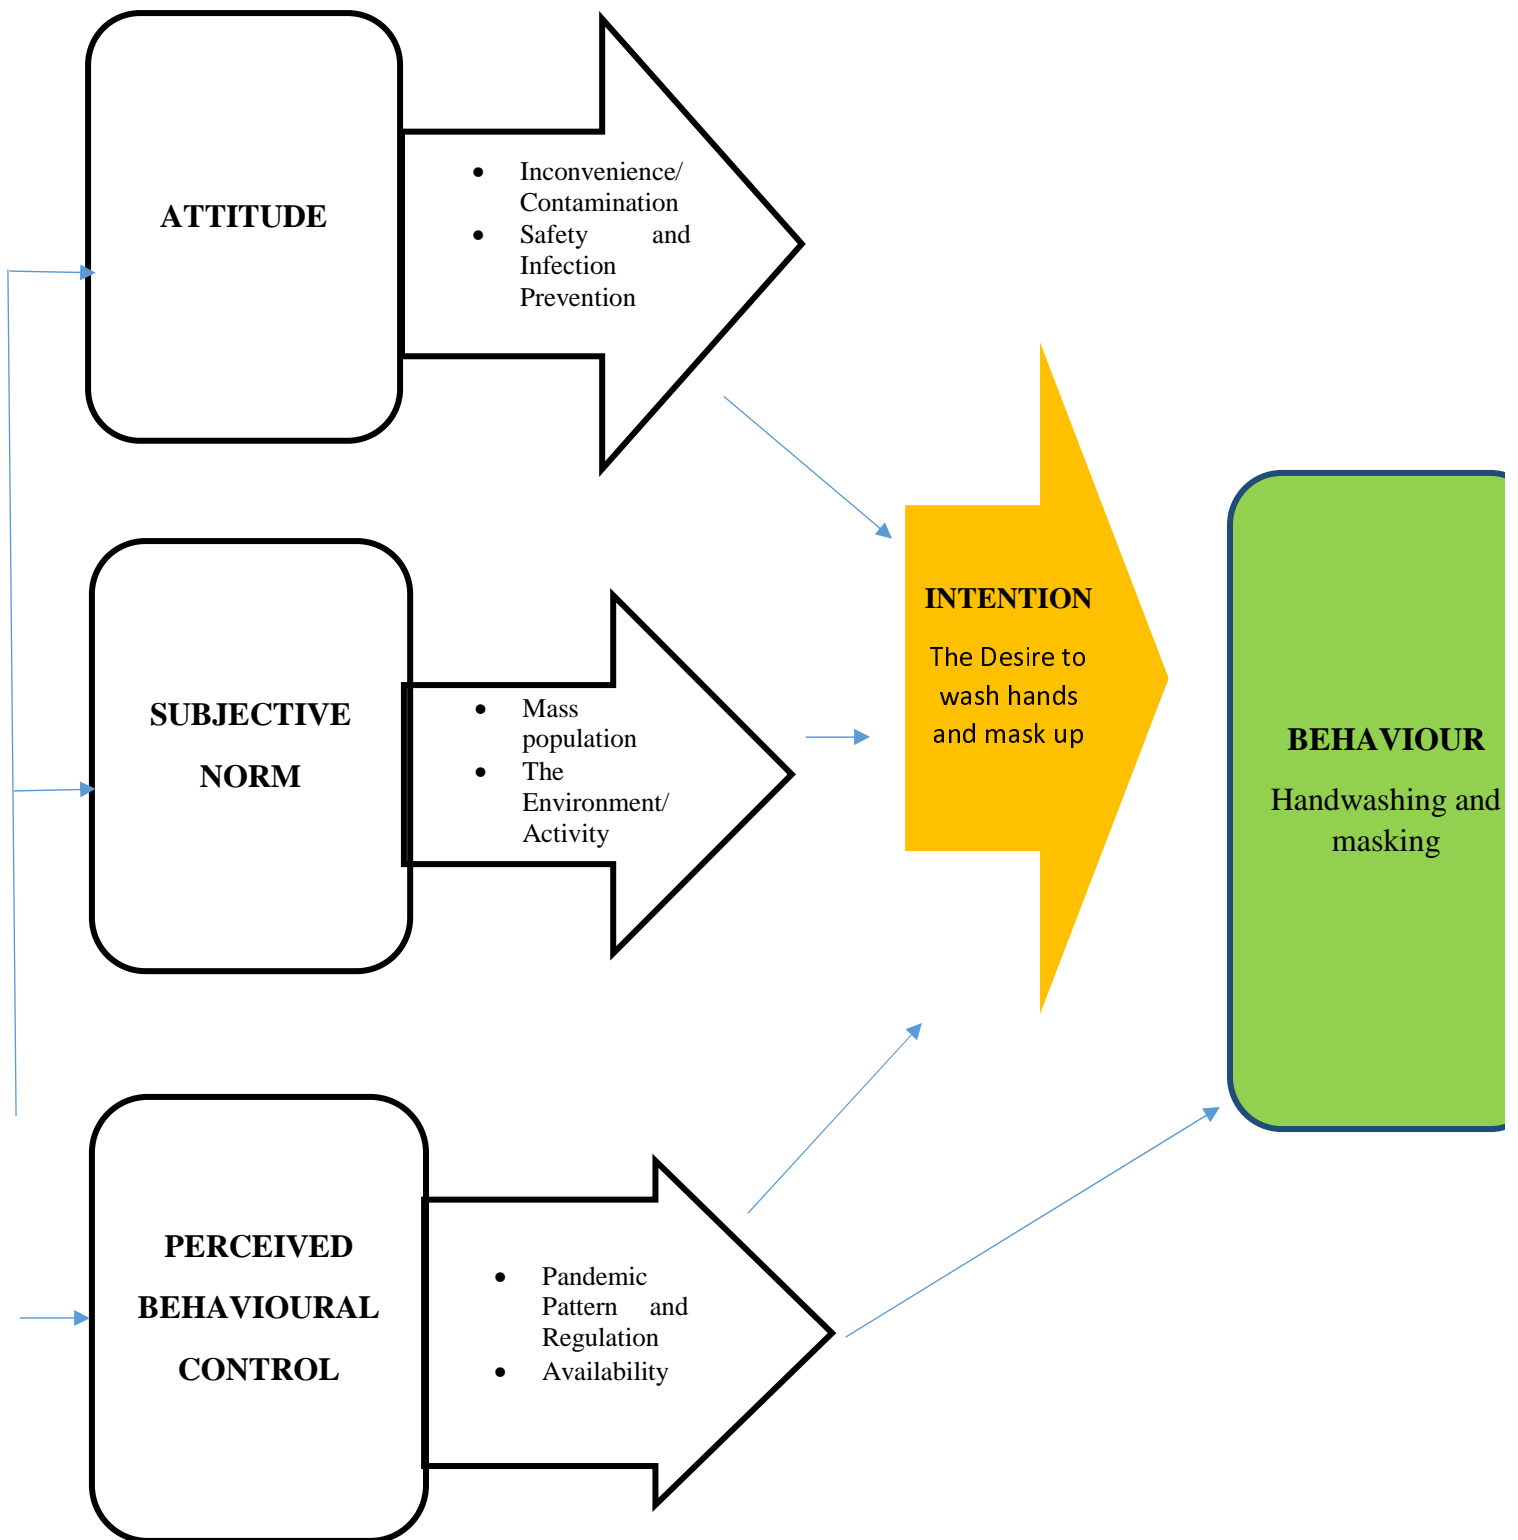

Figure 1: Components of the Theory of Planned Behavior showing major themes emerging.

**Table 4:** Factors reported to be associated with handwashing and masking among the population

| Component of<br>TPB    | Themes                 | Participant Classification |              |             |   |
|------------------------|------------------------|----------------------------|--------------|-------------|---|
|                        |                        | Decliners                  | Non-Regulars | Maintainers |   |
| <b>Attitude</b>        | <b>Inconvenience/</b>  | Difficulty breathing       | -            | -           |   |
|                        | <b>Contamination</b>   | Uncomfortable              | -            | -           |   |
|                        | <b>Safety and</b>      | Getting infections         | -            | -           | + |
|                        | <b>Infection</b>       |                            |              |             |   |
|                        | <b>Prevention</b>      |                            |              |             |   |
|                        | <b>Mass population</b> |                            |              |             |   |
| <b>Subjective Norm</b> |                        | A lot of people            | -            | -           |   |
|                        |                        | Family members             | -            | -           | + |
|                        |                        | Peers and colleagues       | -            | -           | + |
|                        | <b>Environment/</b>    | Work environment           | -            | -           | + |
|                        | <b>Activity</b>        | Home/indoors               | -            | -           | - |
| <b>Perceived</b>       | <b>Pandemic</b>        | Obligatory                 | -            | -           | + |
| <b>Behavioral</b>      | <b>Pattern and</b>     | Incidence of Cases         | -            | -/+         | + |
| <b>Control</b>         | <b>Regulation</b>      |                            |              |             |   |
|                        | <b>Availability</b>    | Access to infection        | -            | -           | + |
|                        |                        | Control items              |              |             |   |

+ denotes factors reported to be positively associated with handwashing and masking

-denotes factors reported to be negatively associated with handwashing and masking

Blank space denote no correlation

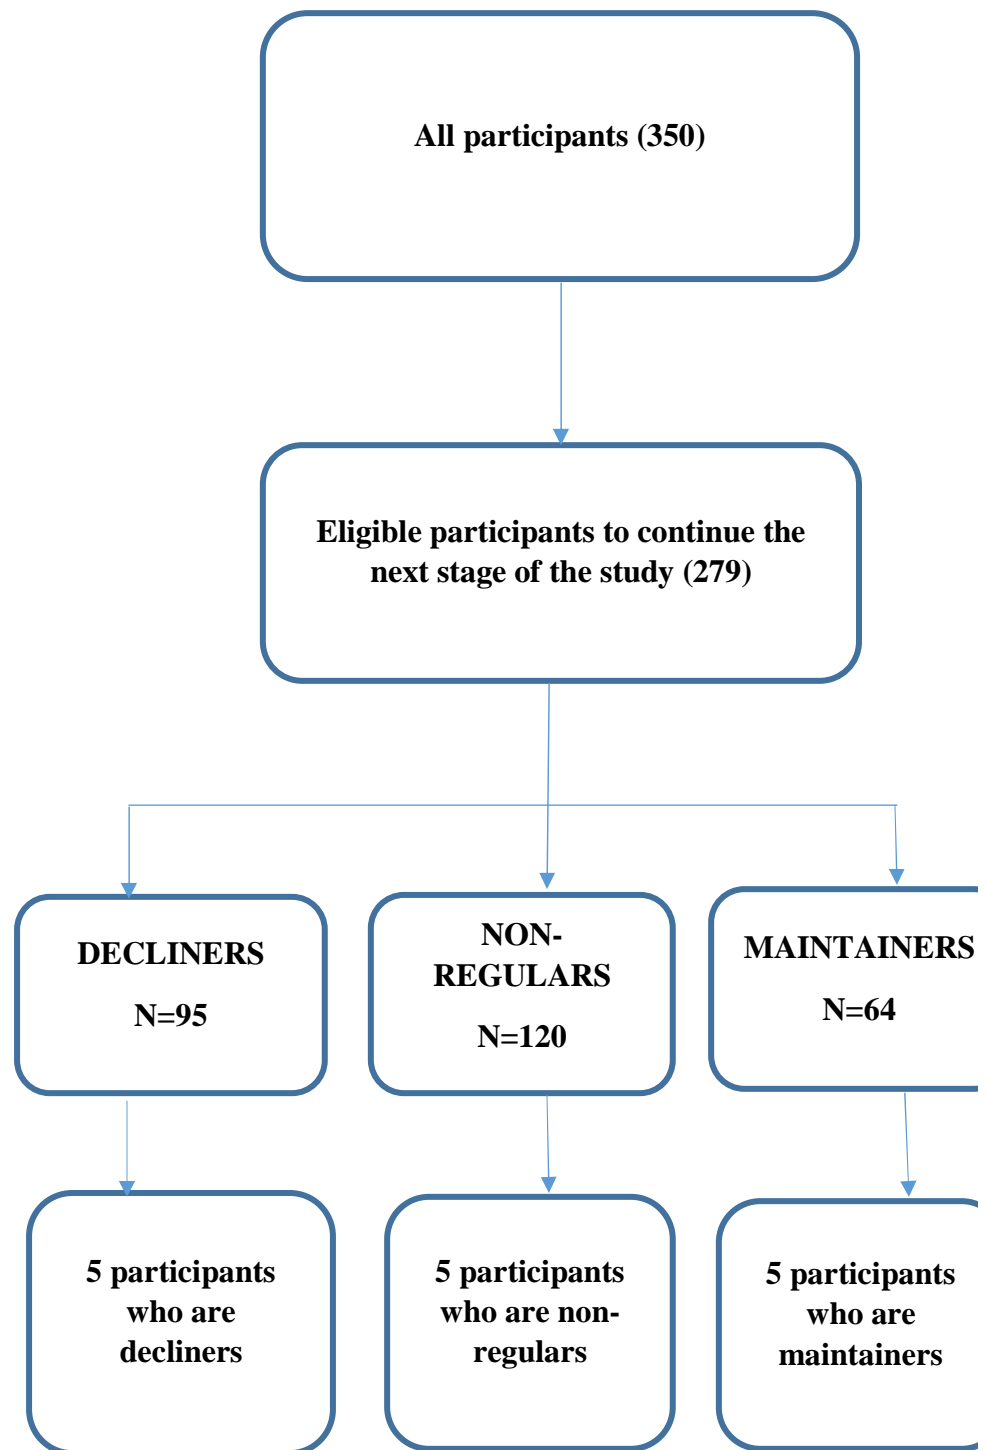

Figure 2: Summary of study procedures

## DISCUSSION

The study explored factors contributing to the decline, non-regularity and maintenance of handwashing and masking in post COVID-19 period. Different themes emerged across the participants of the study, who were grouped as decliners, on-regulars and maintainers based on the initial screening and scoring (Table 3). Decliners, non-regulars and maintainers who had varying views or experience on handwashing and masking discussed as themes. All components of the TPB were represented.

Attitude toward handwashing and masking the first component of TPB was expressed by participants in the form of Inconvenience/Contamination, Safety, and Infection Prevention associated with the behavior. More specifically, decliners and non-regulars described the discomforting, breathing difficulty and getting infected as an impediment to engaging in handwashing and masking, suggesting a negative attitude or intent leading to non-or irregular performance of these activities. In contrast with Maintainers Safety and infection prevention are the motives to engage in these preventive measures. This is consistent with other studies suggesting that prevention against COVID-19 depends on the protective behavior of a population with inherent vulnerability [20] [21] [22].

People in high-risk situations feel the need to be protected or have safety urgency, which contributes to a positive influence and this was the case of the maintainers in this study.

These results indicate that interventions to promote handwashing and masking among the public should be made comfortable and hygienic. Clean and improved sources of handwashing facilities (soap and water), aseptic techniques must be made available at home, workplaces and public spaces.



This plays a significant role in stimulating interest in these behaviors to protect public health. The discomfort or breathing difficulty associated with wearing a face mask can be eased by allowing people to exercise outdoor activity, gather for meetings, or enter public spaces without face covering if they are fully inoculated and everyone should be encouraged to get vaccinated [23].

This is because the inconvenience associated with masking and handwashing could turn off many people from heeding to these activities although COVID-19 initially made them more critical.

In accordance with the second component of TPB, which suggests that the social and environmental pressures (subjective norms) surrounding behavior are positive or negative increasing or decreasing intention. The mass population and the environment form part of themes that influence the commitment toward these measures. Everybody nowadays seems not to adhere to these measures and the mandate is dropping. Only a few ones are doing them and the effect we see in the populace have negative influence among almost all groups in this study. This behavior causes our minds to do the same as we see them every day. Humans are social being, these choices come in the context of social connection, all of which are incited by other people.

It may be difficult for someone to rarely make the choice to wash their hands or mask in isolation of outside influence. Therefore, public educational campaigns must be intensified than before to make the society have a sense of control as a collective behavior toward the pandemic. Public education is essential for the well-being of all to enable us to support ourselves in conducting these practices. Handwashing and masking should be seen as an opportunity, empowerment and self-esteem to care for and support each other in the awake of the pandemic and its aftermath.

Still on social norms, the environment and activities of individuals make an impact. All categories of participants in this study disclosed that when at home or indoors, they don't mask up and wash their hands. For the work environment, only maintainers were positively associated which implies the workplace and activities involved compel people to mask up and wash hands. Hospitals, dirty (dusty places) and professionals like nurses, doctors and other clinicians must observe these preventive measures because of their work environment and activities. Should an individual find him/herself in these places, the priority to practice handwashing and masking is high. This translates as a positive contributor to maintainers and is negatively associated with decliners and non-regulars. Analogously, the work of Ashour and Hassan revealed that the work environment plays a role in the safety performances and practices of people [24]. Maintainers see it as an obligation to exercise reasonable caution because of potential workplace and activity hazard.

It is essential that handwashing and masking are made compulsory in environment or activities where there is potential and possible risk of infection [25] [26]. All individuals entering such environments or doing those activities need to be actively involved in these safety cultures and take concrete steps to do them regularly[25][26].

In this study, some themes appeared to have elements relating to another component of the TPB. An example of this relates to the theme under which decliners, non-regulars and maintainers identified the incidence of cases and their surroundings as a factor influencing intention. A decrease or increase of infection rate in a particular location is important in shaping the behavior of participants. Together, the environment (Subjective norms) and pattern of pandemic and regulation (Perceived behavioral control) interact with each other to ultimately influence handwashing and masking. Throughout the study, participants appeared to talk about how cases

have calm down and handwashing and masking not been mandatory nowadays in most places although COVID-19 is still on-going. Such results could justify interventions or the need to continue with public education even if cases are too small. We are only in a winning position to end the pandemic and now is the worst time to stop handwashing and masking. To seize this opportunity, the general population is urged to take these key actions more seriously. Considering our findings, public health authorities, employers, and essentials services like banks, restaurants could play an important role in enforcing and disseminating such information.

### **Contributions of the Study**

Hand hygiene and the wearing of a mask do not only contribute to the prevention of COVID-19 but also other respiratory viruses. The Public need to continue doing these hygienic rituals even after vaccination or when the pandemic has slowed down. This is the first study to explore and mention the factors responsible for the decline of this behavior. Public Health authorities can plan interventions addressing factors relating to these changing patterns of behavior to reduce the risk of catching COVID-19, other respiratory viruses, and potential infectious diseases or achieve zero transmission.

### **Strength and weakness of the study**

The study involves the recruitment and screening of a large number (368) participants at the initial stage and their categorization as decliners, non-regulars and maintainers. Enough participants from diverse backgrounds across the country were recruited through online platforms and social media (WhatsApp groups, Facebook, online websites) to express their socially accepted views irrespective of age, location, occupation and ethnicity. Participants could understand the purpose of the study without any negative feedback. Steps taken to ensure rigor

include collection of massive data at stage 1 and reducing or transforming them to provide credible representation and categorization of findings. The Analysis of the overall findings was done with peers to establish dependability.

Long-term recall of the last time of handwashing or masking up may impose some limits and the questions used to estimate these activities have not be formally validated. However, pilot testing of the questionnaire suggested that the participants fully understood the purpose of the study.

### **Acknowledgement**

None

### **Funding**

None

### **Conflict of interest**

No conflict of interest to declare

## REFERENCES

1. Ameme, D. K., Odikro, M. A., Baidoo, A., Dsane-Aidoo, P., Nuvey, F. S., Jackson, D. G., Mohammed, A. G., Alemna, F., Tender, E. K., Ghartey, G. N. K., Wullar, O. G., Maximore, L., Asamoah, Y. K., & Kenu, E. (2021). Hand hygiene and face mask wearing practices for COVID-19 prevention: A non-intrusive observation of patrons of community convenience shops in Accra, Ghana. *The Pan African Medical Journal*, 40(195), Article 195. <https://doi.org/10.11604/pamj.2021.40.195.26195>
2. CDC. (2020, February 11). *Healthcare Workers*. Centers for Disease Control and Prevention. <https://www.cdc.gov/coronavirus/2019-ncov/hcp/infection-control-recommendations.html>
3. Wee, L. E. I., Conceicao, E. P., Tan, J. Y., Magesparan, K. D., Amin, I. B. M., Ismail, B. B. S., Toh, H. X., Jin, P., Zhang, J., Wee, E. G. L., Ong, S. J. M., Lee, G. L. X., Wang, A. E., How, M. K. B., Tan, K. Y., Lee, L. C., Phoon, P. C., Yang, Y., Aung, M. K., ... Ling, M. L. (2021). Unintended consequences of infection prevention and control measures during COVID-19 pandemic. *American Journal of Infection Control*, 49(4), 469–477. <https://doi.org/10.1016/j.ajic.2020.10.019>
4. *About Infection Prevention and Controls*. (n.d.). Retrieved September 2, 2022, from <https://www.who.int/teams/integrated-health-services/infection-prevention-control/about>

5. Infection Prevention and Control. (n.d.). COVIDProtocols. Retrieved October 4, 2022, from <https://6308fc71bd5b0d000acabe6b--covid-protocols-web.netlify.app/en/addendum/ward-design-troubleshooting/>
6. Ameme DK, Odikro MA, Baidoo A, Dsane-Aidoo P, Nuvey FS, Jackson DG, et al. Hand hygiene and face mask wearing practices for COVID-19 prevention: a non-intrusive observation of patrons of community convenience shops in Accra, Ghana. *Pan Afr Med J.* 2021;40:195.
7. Reich, P., & Elward, A. (2022). Infection Prevention during the Coronavirus Disease 2019 Pandemic. *Infectious Disease Clinics of North America*, 36(1), 15–37. <https://doi.org/10.1016/j.idc.2021.12.002>
8. Chai, R., Yang, J., Zhang, X., Huang, X., Yu, M., Fu, G., Lan, G., Qiao, Y., Zhou, Q., Li, S., Yao, Y., & Xu, J. (2022). Reasons for COVID-19 Vaccine Hesitancy Among Chinese People Living With HIV/AIDS: Structural Equation Modeling Analysis. *JMIR Public Health and Surveillance*, 8(6), e33995. <https://doi.org/10.2196/33995>
9. Rashid, T. U., Sharmeen, S., & Biswas, S. (2022). Effectiveness of N95 Masks against SARS-CoV-2: Performance Efficiency, Concerns, and Future Directions. *ACS Chemical Health & Safety*. <https://doi.org/10.1021/acs.chas.1c00016>
10. Verbeek, J. H., Rajamaki, B., Ijaz, S., Sauni, R., Toomey, E., Blackwood, B., Tikka, C., Ruotsalainen, J. H., & Balci, F. S. K. (2020). Personal protective equipment for preventing highly infectious diseases due to exposure to contaminated body fluids in healthcare staff. *Cochrane Database of Systematic Reviews*, 5. <https://doi.org/10.1002/14651858.CD011621.pub5>

11. Chiu NC, Chi H, Tai YL, Peng CC, Tseng CY, Chen CC, et al. Impact of Wearing Masks, Hand Hygiene, and Social Distancing on Influenza, Enterovirus, and All-Cause Pneumonia During the Coronavirus Pandemic: Retrospective National Epidemiological Surveillance Study. *J Med Internet Res*. 2020 Aug 20;22(8):e21257.
12. *The Evolution of Infection Prevention and Control during COVID-19*. (n.d.). Public Health Ontario. Retrieved September 2, 2022, from <https://www.publichealthontario.ca/en/About/News/2021/Evolution-IPAC-COVID-19>
13. Havers FP, Pham H, Taylor CA, Whitaker M, Patel K, Anglin O, et al. COVID-19-associated hospitalizations among vaccinated and unvaccinated adults  $\geq 18$  years – COVID-NET, 13 states, January 1 – July 24, 2021 [Internet]. 2021 Aug [cited 2021 Oct 6] p. 2021.08.27.21262356. Available from: <https://www.medrxiv.org/content/10.1101/2021.08.27.21262356v1>
14. News ABC. Now that we have 2 vaccines, will life return to normal? [Internet]. ABC News. [cited 2023 Mar 31]. Available from: <https://abcnews.go.com/Health/now-vaccines-life-return-normal/story?id=74722743>
15. Bacchetti P, Wolf LE, Segal MR, McCulloch CE. Ethics and sample size. *Am J Epidemiol*. 2005 Jan 15;161(2):105–10.
16. Serwaa D, Lamptey E, Appiah AB, Senkyire EK, Ameyaw JK. Knowledge, risk perception and preparedness towards coronavirus disease-2019 (COVID-19) outbreak among Ghanaians: a quick online cross-sectional survey. *Pan Afr Med J*. 2020 May 20;35(Suppl 2):44.
17. Van Griethuijsen, R. A. L. F., van Eijck, M. W., Haste, H., den Brok, P. J., Skinner, N. C., Mansour, N., Savran Gencer, A., & BouJaoude, S. (2015). Global Patterns in

- Students' Views of Science and Interest in Science. *Research in Science Education*, 45(4), 581–603. <https://doi.org/10.1007/s11165-014-9438-6>
18. Aiello AE, Murray GF, Perez V, Coulborn RM, Davis BM, Uddin M, et al. Mask use, hand hygiene, and seasonal influenza-like illness among young adults: A randomized intervention trial. *The Journal of Infectious Diseases*. 2010 Feb 15;201(4):491–8.
19. Tong, A., Sainsbury, P., & Craig, J. (2007). Consolidated criteria for reporting qualitative research (COREQ): A 32-item checklist for interviews and focus groups. *International Journal for Quality in Health Care: Journal of the International Society for Quality in Health Care*, 19(6), 349–357. <https://doi.org/10.1093/intqhc/mzm042>
20. Mendoza-Jiménez, M.-J., Hannemann, T.-V., & Atzendorf, J. (2021). Behavioral Risk Factors and Adherence to Preventive Measures: Evidence From the Early Stages of the COVID-19 Pandemic. *Frontiers in Public Health*, 9. <https://www.frontiersin.org/articles/10.3389/fpubh.2021.674597>
21. Pan, Y., Xin, M., Zhang, C., Dong, W., Fang, Y., Wu, W., Li, M., Pang, J., Zheng, Z., Wang, Z., Yuan, J., & He, Y. (2020). Associations of Mental Health and Personal Preventive Measure Compliance With Exposure to COVID-19 Information During Work Resumption Following the COVID-19 Outbreak in China: Cross-Sectional Survey Study. *Journal of Medical Internet Research*, 22(10), e22596. <https://doi.org/10.2196/22596>
22. Pan, Y., Fang, Y., Xin, M., Dong, W., Zhou, L., Hou, Q., Li, F., Sun, G., Zheng, Z., Yuan, J., Wang, Z., & He, Y. (2020). Self-Reported Compliance With Personal Preventive Measures Among Chinese Factory Workers at the Beginning of Work Resumption Following the COVID-19 Outbreak: Cross-Sectional Survey Study. *Journal of Medical Internet Research*, 22(9), e22457. <https://doi.org/10.2196/22457>



23. Jr, B. L. (n.d.). *CDC says fully vaccinated people can exercise, hold small gatherings outdoors without masks*. CNBC. Retrieved September 28, 2022, from <https://www.cnbc.com/2021/04/27/cdc-fully-vaccinated-people-can-exercise-hold-small-gatherings-outdoors-without-masks.html>
24. Ashour, A., & Hassan, Z. (2019). The Role of the Work Environment on the Safety Performance and Safety Management Practices: Its Influence on the Attitudes of Nurses in the Jordanian Hospitals. *American Journal of Applied Sciences*, 16(11), 314–326. <https://doi.org/10.3844/ajassp.2019.314.326>
25. Lamptey, E., Senkyire, E. K., Benita, D. A., & Ameyaw, J. K. (2021). Managing the Behaviour of People who Disregard COVID-19 Safety Preventive Measures. *Erciyes Medical Journal*, 43(6), 519-522.
26. Azzouzi, S., Stratton, C., Muñoz-Velasco, L. P., Wang, K., Fourtassi, M., Hong, B.-Y., Cooper, R., Balikuddembe, J. K., Palomba, A., Peterson, M., Pandiyan, U., Krassioukov, A., Tripathi, D. R., Tuakli-Wosornu, Y. A., & Hajjioui, A. (2022). The Impact of the COVID-19 Pandemic on Healthy Lifestyle Behaviors and Perceived Mental and Physical Health of People Living with Non-Communicable Diseases: An International Cross-Sectional Survey. *Int. j. Environ. Res. Public Health (Online)*. <https://www.ncbi.nlm.nih.gov/pmc/articles/PMC9265593>

## **QUESTIONNAIRES**

### **APPENDIX 1**

#### **STAGE 1**

#### **DEMOGRAPHICS**

1. Age .....
2. Gender
  - a) Male
  - b) Female
3. Marital status
  - a) Single
  - b) Married
  - c) Relationship
  - d) Separated
4. Education attained
  - a. Basic
  - b. Secondary
  - c. Higher
5. Occupation

- a. Employed
- b. Unemployed

## **HANDWASHING AND MASKING QUESTIONNAIRES**

**6. Have you been handwashing , masking up or doing any one of them in the past seven days**

- a) No
- b) Yes

**7. If No, no need to continue just submit but if yes how many times a week**

- 1) None
- 2) 1-2 times a week
- 3) 3-4 times a week
- 4) 5-6 times a week
- 5) 7 times or more a week

**8. How often are you active at wearing mask , washing your hands or doing any one of them in the last 7 days**

- 1) I dont do any
- 2) Hardly ever
- 3) Sometimes
- 4) Quite often
- 5) Always

**9. In the last 7 days, how many days have you worn a mask , washed your hands or done any one of them when going to public spaces or returning from public gathering**

- 1) None
- 2) 1 time last week
- 3) 2 or 3 times last week
- 4) 4 times last week
- 5) 5 times last week

**10. Which one of the following describes you best for the last 7 days. Read all five statements before deciding on one answer that describe you.**

- 1) All or most of my time, I do little masking and or handwashing
- 2) I sometimes (1-2 times last week) worn a mask and or wash the hands
- 3) I often (3-4 times last week) mask up and or wash my hands
- 4) I quite often (5-6 times last week) did wear mask and or washed my hands
- 5) I very often (7 or more times last week) did masked up and or washed my hands

## **APPENDIX 2**

### **STAGE 2**

#### **QUESTIONNAIRE FOR THE QUALITATIVE OR OPEN ENDED QUESTIONS**

Each group was asked 4 questions designed purposeful for the group as below.

##### **GROUP1 (Decliners)**

1. What don't you like about Masking Up and Handwashing?

2. What prevents you from doing them?
3. Which people around you do you see not wearing face mask and washing their hands?
4. What has contributed to you not been able to wash hands and mask up.

### **GROUP2 (The Non-regulars)**

1. What don't you like about masking up and handwashing making it not a necessity to do them regularly?
2. What could motivate you to mask up and wash hands regularly than before?
3. Who do you see around you not masking up and washing hands regularly like you?
4. What has contributed to your partial or irregular habit of masking up and washing the hands?

### **GROUP 3(Maintainers)**

1. What do you like about always masking up and washing your hands?
2. What motivate you to do them?
3. Who do you see masking up and washing hands in your surrounding like you?
4. What has contributed to your masking up and handwashing as a regular habit?
